# Supplementary material for: Identification of the Prognostic LncRNA Biomarkers and Comprehensive Analysis of LncRNA-Mediated ceRNA Network for Uterine Corpus Endometrial Carcinoma
Source: Research Square preprint supplement (doi:10.21203/rs.3.rs-989585/v1), 2021-11-08
Supplement: Supplementary file 1 [file dff8059c35a791aa15e6c630.docx]

| Supplement Table 1 The top 10 up and down regulated DElncRNAs, DEmiRNAs and DEmRNAs in UCEC patients for TCGA (above three ones) database and CPTAC database(lower three ones). | | | | | | | |
| --- | --- | --- | --- | --- | --- | --- | --- |
| **lncRNA** | **logFC** | **logCPM** | | **PValue** | | | **FDR** |
| RP11-679B19.1 | -4.609665565 | 6.530968909 | | 1.6397E-194 | | | 1.3475E-190 |
| MBNL1-AS1 | -3.741748824 | 8.755912505 | | 4.6355E-187 | | | 1.9047E-183 |
| LINC01197 | -3.950847703 | 6.400468962 | | 2.2879E-158 | | | 6.2672E-155 |
| LINC01016 | -6.306247501 | 6.066382992 | | 1.3589E-155 | | | 2.7919E-152 |
| RP11-613D13.8 | -5.037151715 | 5.178629807 | | 1.079E-154 | | | 1.7735E-151 |
| MIR202HG | -8.211270213 | 5.501504991 | | 1.7643E-154 | | | 2.4165E-151 |
| MEF2C-AS1 | -4.234988486 | 5.146458797 | | 1.0996E-146 | | | 1.291E-143 |
| LINC00702 | -4.632384251 | 6.619106924 | | 2.4588E-143 | | | 2.5258E-140 |
| RP11-535A5.1 | -5.379666932 | 4.124845545 | | 6.5591E-136 | | | 5.9892E-133 |
| ACTA2-AS1 | -4.167647477 | 7.842288237 | | 3.699E-128 | | | 3.0398E-125 |
| RP6-65G23.3 | 2.424491976 | 8.170464715 | | 5.29E-39 | | | 3.50E-37 |
| TFAP2A-AS1 | 3.540784393 | 7.623581464 | | 1.97E-34 | | | 9.91E-33 |
| TRPM2-AS | 3.118967302 | 9.378205266 | | 9.78E-32 | | | 4.39E-30 |
| RP11-57A19.2 | 3.319194854 | 7.989516924 | | 8.17E-31 | | | 3.42E-29 |
| LINC00858 | 4.094175485 | 6.893728812 | | 1.46E-29 | | | 5.75E-28 |
| RP4-635E18.6 | 2.234532646 | 6.072501653 | | 4.71E-29 | | | 1.78E-27 |
| RP11-443B20.1 | 2.070790115 | 7.52494364 | | 9.07E-29 | | | 3.39E-27 |
| FAM83H-AS1 | 2.522429397 | 11.54381403 | | 3.41E-28 | | | 1.24E-26 |
| RP11-303E16.2 | 2.025677626 | 9.317319558 | | 6.46E-27 | | | 2.19E-25 |
| RP11-465N4.4 | 2.070113718 | 7.780077623 | | 9.77E-27 | | | 3.26E-25 |
| **miRNA** | **logFC** | | **logCPM** | **PValue** | | | **FDR** |
| hsa-mir-202 | -9.053278925 | | 3.426902818 | 2.20E-266 | | | 1.50E-263 |
| hsa-mir-139 | -3.303204309 | | 4.724789121 | 1.69E-113 | | | 5.75E-111 |
| hsa-mir-101-2 | -2.594505882 | | 12.32873184 | 1.79E-109 | | | 4.04E-107 |
| hsa-mir-101-1 | -2.592962483 | | 12.31864278 | 5.58E-109 | | | 9.46E-107 |
| hsa-mir-140 | -2.572395288 | | 9.538938356 | 5.43E-107 | | | 7.37E-105 |
| hsa-mir-143 | -3.416483965 | | 16.51631794 | 2.00E-93 | | | 2.26E-91 |
| hsa-mir-145 | -3.262670245 | | 11.43527602 | 1.60E-91 | | | 1.55E-89 |
| hsa-mir-542 | -2.880683315 | | 8.124890384 | 1.97E-86 | | | 1.67E-84 |
| hsa-mir-100 | -3.345617451 | | 12.11361639 | 5.29E-81 | | | 3.99E-79 |
| hsa-mir-424 | -3.156111844 | | 8.33177413 | 1.11E-73 | | | 7.52E-72 |
| hsa-mir-183 | 4.428895958 | | 14.26832082 | 2.97E-54 | | | 7.75E-53 |
| hsa-mir-96 | 3.835747829 | | 5.71119686 | 9.55E-47 | | | 2.16E-45 |
| hsa-mir-182 | 3.764054615 | | 15.34495864 | 6.73E-43 | | | 1.34E-41 |
| hsa-mir-1307 | 2.058708346 | | 11.19105576 | 5.45E-37 | | | 9.02E-36 |
| hsa-mir-200a | 2.689505063 | | 11.15480027 | 5.16E-36 | | | 7.78E-35 |
| hsa-mir-130b | 2.202502881 | | 6.142857397 | 4.44E-31 | | | 6.15E-30 |
| hsa-mir-429 | 2.854246283 | | 8.851947393 | 4.63E-31 | | | 6.17E-30 |
| hsa-mir-877 | 3.113467805 | | 2.349670899 | 3.81E-29 | | | 4.79E-28 |
| hsa-mir-210 | 2.816111439 | | 10.81766962 | 7.66E-28 | | | 9.29E-27 |
| hsa-mir-200b | 2.275598674 | | 10.85998217 | 1.76E-26 | | | 2.06E-25 |
| **mRNA** | logFC | | logCPM | **PValue** | | | **FDR** |
| CSRP1 | -2.907945921 | | 8.455452802 | 1.87E-216 | | | 3.37E-212 |
| MYLK | -4.311931235 | | 7.238331211 | 3.99E-210 | | | 3.60E-206 |
| PPP1R12B | -4.210166343 | | 6.30001368 | 2.82E-208 | | | 1.70E-204 |
| GSTM5 | -5.021590783 | | 2.409866329 | 1.27E-197 | | | 5.73E-194 |
| TNS1 | -3.416332066 | | 7.035411869 | 4.60E-190 | | | 1.66E-186 |
| CBX7 | -3.278024706 | | 4.409436085 | 5.20E-185 | | | 1.56E-181 |
| SYNPO2 | -4.539556297 | | 5.8953856 | 4.30E-184 | | | 1.11E-180 |
| GPRASP1 | -3.723657127 | | 2.942139577 | 6.97E-179 | | | 1.57E-175 |
| RERG | -4.793611622 | | 3.7151094 | 3.44E-176 | | | 6.90E-173 |
| LYVE1 | -3.675154124 | | 1.345640227 | 4.74E-172 | | | 8.55E-169 |
| TBC1D7 | 2.050198189 | | 4.901671184 | 1.75E-58 | | | 7.83E-57 |
| CDC6 | 3.188311841 | | 4.802656544 | 3.02E-55 | | | 1.26E-53 |
| PRAME | 4.160544447 | | 8.019274758 | 5.88E-54 | | | 2.36E-52 |
| C16orf59 | 3.02543474 | | 4.058818372 | 5.76E-52 | | | 2.15E-50 |
| ASF1B | 3.235057427 | | 5.677795682 | 1.13E-50 | | | 4.08E-49 |
| POC1A | 2.930270522 | | 4.555914044 | 5.24E-50 | | | 1.85E-48 |
| PKMYT1 | 3.676875293 | | 4.805974699 | 9.59E-50 | | | 3.39E-48 |
| RNFT2 | 2.811744393 | | 3.879030558 | 6.08E-49 | | | 2.08E-47 |
| HN1 | 2.61482313 | | 7.325508943 | 2.09E-48 | | | 7.02E-47 |
| KIFC1 | 3.374364309 | | 5.934283212 | 5.34E-48 | | | 1.78E-46 |
| **lncRNA** | logFC | | logCPM | **PValue** | | | **FDR** |
| RP11-254F19.2 | -4.707311483 | | 5.299971932 | 9.17E-43 | | | 1.04E-38 |
| RP11-324I22.3 | -3.236228261 | | 4.464039034 | 4.10E-40 | | | 2.32E-36 |
| RP11-720L2.2 | -3.360306188 | | 3.613693572 | 7.97E-37 | | | 3.01E-33 |
| MBNL1-AS1 | -2.890098457 | | 8.535109417 | 1.73E-35 | | | 4.90E-32 |
| RP11-380D23.1 | -3.929502134 | | 5.467847224 | 2.12E-33 | | | 4.79E-30 |
| CTD-2647E9.3 | -2.738058426 | | 4.601971327 | 1.32E-32 | | | 2.50E-29 |
| ATP1B3-AS1 | -2.512165702 | | 6.170458397 | 2.81E-32 | | | 4.55E-29 |
| RP11-753H16.5 | -2.672739403 | | 4.498713319 | 5.95E-32 | | | 7.48E-29 |
| RP11-22H5.2 | -3.19419286 | | 4.452740583 | 1.96E-31 | | | 2.22E-28 |
| XXyac-YX65C7_A.2 | -3.149517791 | | 5.176243387 | 2.29E-30 | | | 2.16E-27 |
| RP11-465B22.8 | 3.229998114 | | 7.44524169 | 3.78E-29 | | | 2.67E-26 |
| U47924.27 | 3.141678103 | | 6.86806041 | 7.44E-29 | | | 4.95E-26 |
| U47924.29 | 2.826951987 | | 4.603599682 | 1.26E-25 | | | 5.08E-23 |
| FAM83H-AS1 | 3.958170755 | | 9.389238858 | 1.58E-25 | | | 5.95E-23 |
| C1orf147 | 2.572962546 | | 5.607313286 | 3.35E-24 | | | 9.26E-22 |
| RP11-22C11.2 | 2.919838778 | | 5.988782 | 5.27E-24 | | | 1.41E-21 |
| RP11-473M20.5 | 2.866837745 | | 6.693075791 | | | 8.41E-24 | 2.07E-21 |
| RP4-569M23.2 | 2.53751859 | | 7.512388024 | | | 3.11E-23 | 6.28E-21 |
| AC073046.25 | 2.057664512 | | 6.150134287 | | | 6.21E-23 | 1.12E-20 |
| RP11-435O5.2 | 2.150224405 | | 6.393448529 | | | 7.01E-23 | 1.24E-20 |
| **miRNA** | logFC | | **logCPM** | | **PValue** | | **FDR** |
| hsa-mir-133a-1 | -3.123679701 | | 7.778774524 | | 2.21E-13 | | 5.47E-12 |
| hsa-mir-133a-2 | -3.121359147 | | 7.77946003 | | 2.54E-13 | | 6.13E-12 |
| hsa-mir-873 | -3.100210187 | | 3.341201683 | | 2.78E-11 | | 3.95E-10 |
| hsa-mir-133b | -2.855327099 | | 1.945475308 | | 1.80E-08 | | 1.61E-07 |
| hsa-mir-202 | -2.724034421 | | 0.84631269 | | 1.69E-07 | | 1.25E-06 |
| hsa-mir-1-2 | -2.643892028 | | 10.72815455 | | 1.09E-09 | | 1.25E-08 |
| hsa-mir-1-1 | -2.63294447 | | 10.64051555 | | 1.56E-09 | | 1.74E-08 |
| hsa-mir-143 | -2.534166876 | | 15.66352197 | | 1.80E-15 | | 6.25E-14 |
| hsa-mir-139 | -2.516027773 | | 7.164410618 | | 9.63E-17 | | 4.39E-15 |
| hsa-mir-876 | -2.507773051 | | 0.232650124 | | 8.96E-07 | | 5.18E-06 |
| hsa-mir-200b | 4.504168715 | | 14.3696645 | | 1.92E-34 | | 1.66E-31 |
| hsa-mir-200c | 3.993082006 | | 14.32096226 | | 1.80E-30 | | 6.69E-28 |
| hsa-mir-182 | 5.161618639 | | 12.60503609 | | 2.31E-30 | | 6.69E-28 |
| hsa-mir-183 | 4.927002062 | | 11.65678037 | | 2.07E-28 | | 4.49E-26 |
| hsa-mir-429 | 4.227596071 | | 11.253198 | | 3.26E-27 | | 5.66E-25 |
| hsa-mir-1307 | 2.450045098 | | 7.96356071 | | 5.24E-26 | | 7.57E-24 |
| hsa-mir-200a | 4.095845848 | | 12.12704419 | | 1.30E-25 | | 1.61E-23 |
| hsa-mir-96 | 4.666652668 | | 7.180974872 | | 9.79E-23 | | 7.71E-21 |
| hsa-mir-425 | 2.465213335 | | 10.47962229 | | 7.67E-19 | | 5.54E-17 |
| hsa-mir-556 | 3.757866523 | | 2.532672262 | | 3.01E-17 | | 1.74E-15 |
| **mRNAs** | **logFC** | | **logCPM** | | **PValue** | | **FDR** |
| CREM | -2.439362866 | | 5.301819805 | | 9.92E-51 | | 1.83E-46 |
| ATP8B4 | -3.013257354 | | 5.260889567 | | 5.71E-46 | | 5.27E-42 |
| KLF2 | -3.196350652 | | 3.485181239 | | 8.88E-44 | | 3.28E-40 |
| NR4A3 | -4.135574937 | | 5.18026954 | | 2.25E-42 | | 5.94E-39 |
| ZNF331 | -2.366012989 | | 5.798425479 | | 1.71E-41 | | 3.95E-38 |
| CRISPLD2 | -3.569809933 | | 6.619459698 | | 2.28E-41 | | 4.67E-38 |
| GPRASP1 | -2.359715433 | | 5.886424608 | | 1.45E-40 | | 2.69E-37 |
| C11orf96 | -3.85102415 | | 4.853093905 | | 3.08E-38 | | 4.75E-35 |
| FAM65C | -2.41825427 | | 3.810645708 | | 3.74E-36 | | 4.32E-33 |
| TCEAL4 | -2.046345618 | | 6.309624404 | | 3.64E-36 | | 4.32E-33 |
| ST14 | 3.02398522 | | 7.566481661 | | 9.61E-36 | | 1.04E-32 |
| CDC42BPG | 3.044699757 | | 4.766226251 | | 1.64E-32 | | 9.17E-30 |
| LLGL2 | 2.44927257 | | 6.740518983 | | 3.42E-32 | | 1.71E-29 |
| FAM83H | 3.431407861 | | 5.968257159 | | 1.28E-31 | | 5.72E-29 |
| DPP3 | 2.01130707 | | 5.799654989 | | 1.39E-30 | | 4.77E-28 |
| MAP3K9 | 2.483993143 | | 5.543775372 | | 1.73E-30 | | 5.81E-28 |
| MYO10 | 2.304734505 | | 7.862393745 | | 3.23E-29 | | 8.29E-27 |
| KDF1 | 2.460145427 | | 3.701162092 | | 5.35E-29 | | 1.27E-26 |
| STXBP2 | 2.226110239 | | 4.541972622 | | 1.28E-28 | | 2.86E-26 |
| MARVELD2 | 2.480561709 | | 5.529167599 | | 1.34E-28 | | 2.94E-26 |
